# Supplementary material
Source: PubMed Central journal article supplement (PMC3427908)
Supplement: NIHMS389420-supplement-1.pdf [file NIHMS389420-supplement-1.pdf]

## **Somatic mosaic *IDH1* or *IDH2* mutations are associated with enchondroma and spindle cell hemangioma in Ollier disease and Maffucci syndrome**

Twinkal C. Pansuriya<sup>1</sup>, Ronald van Eijk<sup>1</sup>, Pio d' Adamo<sup>2</sup>, Marieke L. Kuijjer<sup>1</sup>, Jan Oosting<sup>1</sup>, Anne-Marie Cleton-Jansen<sup>1</sup>, Sofie L.J. Verbeke<sup>1,3</sup>, Daniëlle Meijer<sup>1</sup>, Tom van Wezel<sup>1</sup>, Karolin H. Nord<sup>4</sup>, Luca Sangiorgi<sup>5</sup>, Berkin Toker<sup>6</sup>, Bernadette Liegl-Atzwanger<sup>7</sup>, Mikel San-Julian<sup>8</sup>, Raf Sciot<sup>9</sup>, Nisha Limaye<sup>10</sup>, Lars-Gunnar Kindblom<sup>11</sup>, Soeren Daugaard<sup>12</sup>, Catherine Godfraind<sup>13</sup>, Laurence M. Boon<sup>9, 14</sup>, Miikka Vikkula<sup>9, 15</sup>, Kyle C. Kurek<sup>16</sup>, Karoly Szuhai<sup>17</sup>, Pim J. French<sup>18</sup> and Judith V.M.G. Bovée<sup>1</sup>

<sup>1</sup>Department of Pathology, Leiden University Medical Center, Leiden, The Netherlands

<sup>2</sup>Institute for Maternal and Child Health - IRCCS "Burlo Garofolo" – Trieste, University of Trieste, Italy

<sup>3</sup>Department of Pathology, University Hospital Antwerp, Antwerp, Belgium

<sup>4</sup>Department of Clinical Genetics, Lund University Hospital, Lund, Sweden

<sup>5</sup>Department of Medical Genetics, Rizzoli Orthopedic Institute, Bologna, Italy

<sup>6</sup>Istanbul University Medical School, Istanbul, Turkey

<sup>7</sup>Institute of Pathology, Medical University, Graz, Austria

<sup>8</sup>Department of Orthopaedic Surgery and Traumatology, University Clinic of Navarra, Pamplona, Spain

<sup>9</sup>Department of Pathology, University of Leuven, Leuven, Belgium

<sup>10</sup>de Duve Institute, Université catholique de Louvain, Brussels, Belgium

<sup>11</sup>Department of Musculoskeletal Pathology, Royal Orthopaedic Hospital, Birmingham, United Kingdom

<sup>12</sup>Department of Pathology, University of Copenhagen, Copenhagen, Denmark

<sup>13</sup>Laboratory of Pathology, Cliniques universitaires St-Luc, Université catholique de Louvain, Brussels, Belgium

<sup>14</sup>Center for Vascular Anomalies, Division of Plastic Surgery, Cliniques universitaires St-Luc, Université catholique de Louvain, Brussels, Belgium

<sup>15</sup>Walloon Excellence in Lifesciences and Biotechnology (WELBIO), Université catholique de Louvain, Brussels, Belgium

<sup>16</sup>Department of Pathology, Children's Hospital Boston and Harvard Medical School, Boston, MA, USA

<sup>17</sup>Department of Molecular Cell Biology, Leiden University Medical Center, Leiden, The Netherlands

<sup>18</sup>Department of Neurology, Erasmus University Medical Center, Erasmus University Rotterdam, The Netherlands

### **Corresponding author**

Judith V.M.G. Bovée, MD, PhD, Department of Pathology, Leiden University Medical Center, P.O. Box 9600, L1-Q, 2300 RC Leiden, The Netherlands. Tel: +31 71 5266617. Fax: +31 71 5266952. J.V.M.G.Bovée@lumc.nl

# Supplementary Fig. 1 Output of sequencing and hydrolysis probes assay

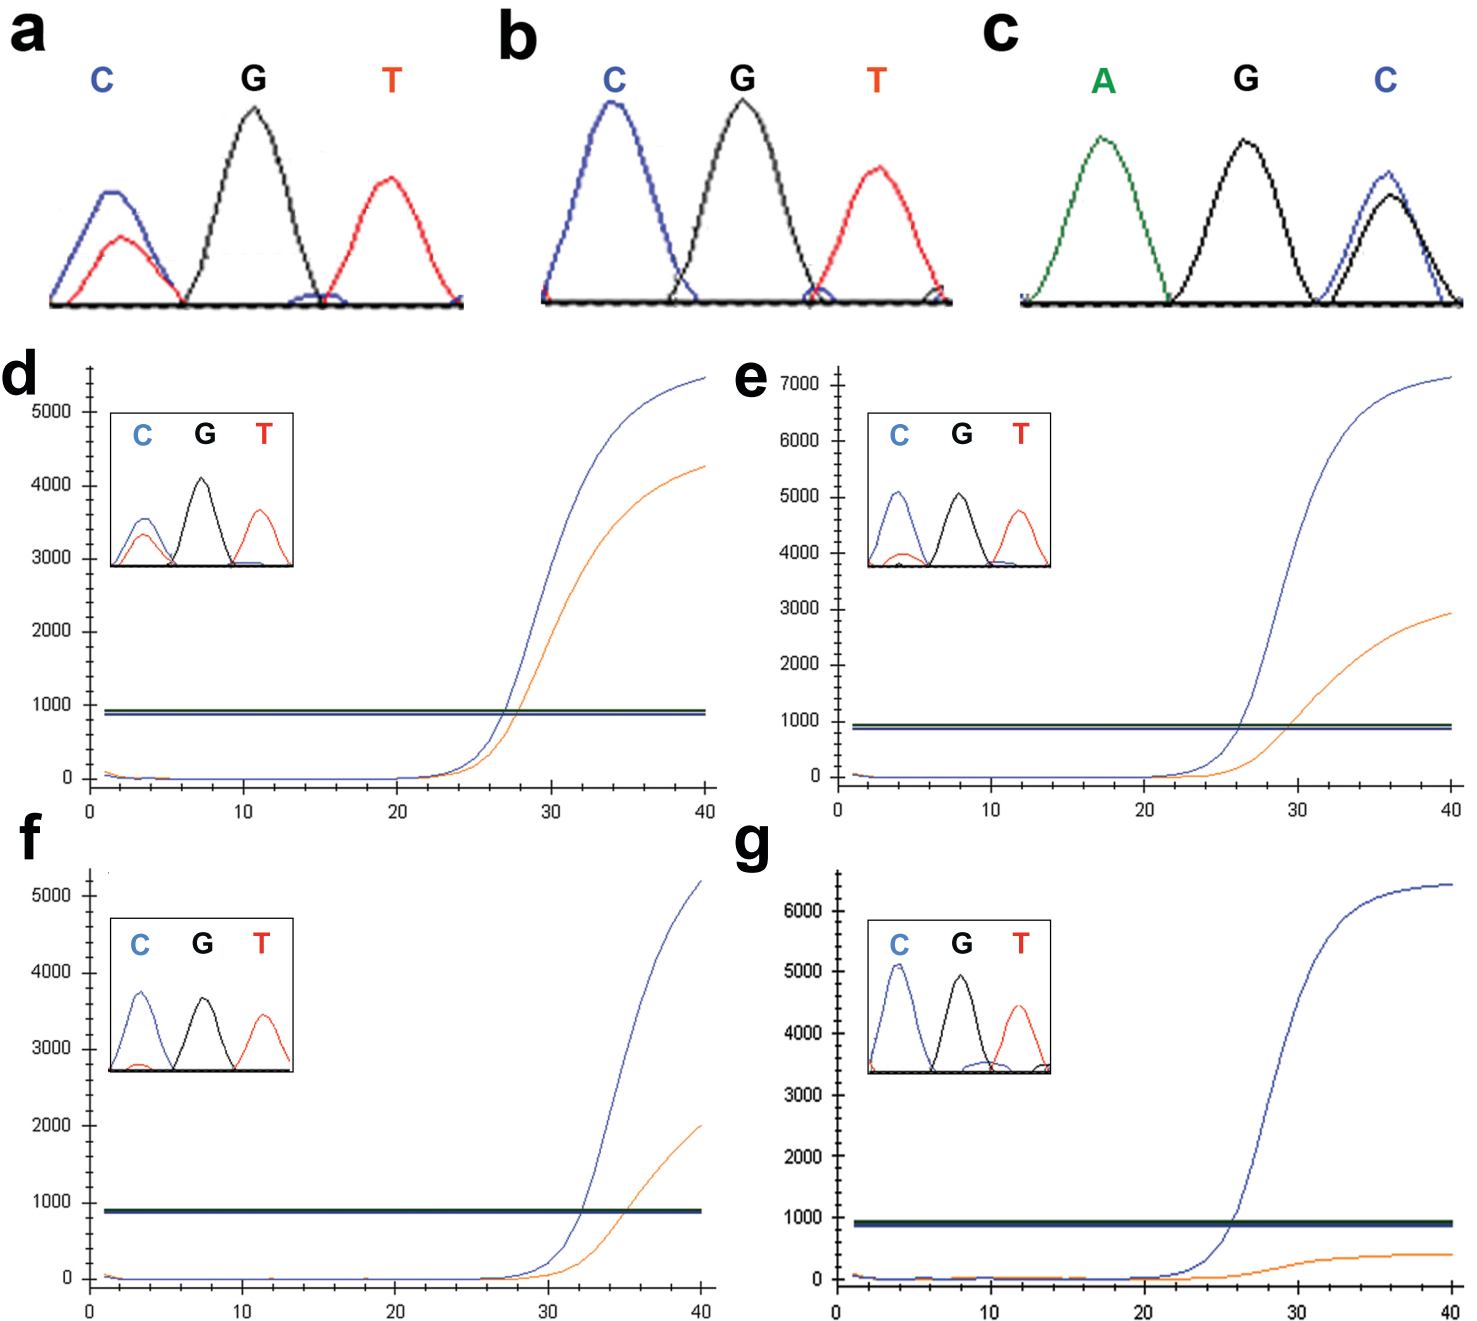

a, b) Example of Sanger sequencing results showing that R132C IDH1 mutation was present in enchondroma and absent in corresponding blood DNA of a patient with Ollier disease. c) Example of Sanger sequencing results showing R172S IDH2 mutation in a single patient with Ollier disease. d-g) Relative Fluorescent Units (RFU) are plotted against the quantification cycle (Cq). The horizontal line at 950 RFU indicates the threshold level for allele calling. All samples show a positive signal for both wild type (blue) and the IDH1 c.395C>T, p.R132C mutant allele (orange). d) L1684 carrying the R132C IDH1 mutation on Sanger sequencing (inset) confirmed with hydrolysis probes assay. e) L1980 and f) L204 have minor IDH1 positive cell populations. The R132C IDH1 mutant allele is barely visible after Sanger sequencing (inset) but it clearly presents as mutant using hydrolysis probes assay. g) L172 is negative for the mutation, in Sanger sequencing (inset) as well as in hydrolysis probes assay.

Supplementary Fig. 2 Normalized expression levels of *DLX5*

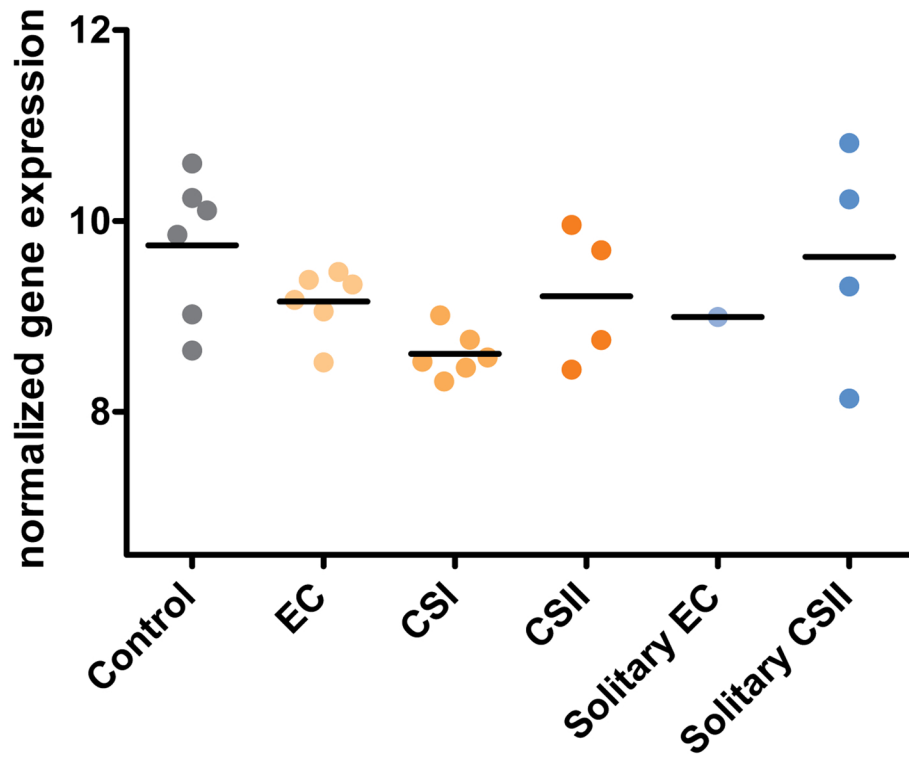

EC: enchondroma, CS : chondrosarcoma

**Supplementary Table 1. Clinical information of patients with Ollier disease and Maffucci syndrome**

| <b>Patient ID</b> | <b>Sample ID</b>       | <b>IDH1 mutation</b> | <b>IDH2 mutation</b> | <b>Gender</b> | <b>Age</b> | <b>Disease</b> | <b>Tumor</b> | <b>Tumor location</b> |
|-------------------|------------------------|----------------------|----------------------|---------------|------------|----------------|--------------|-----------------------|
| O1                | L1083                  | R132C                |                      | male          | 48         | Ollier         | CSI          | metacarpal            |
|                   | L2218                  | R132C                |                      | male          | 49         | Ollier         | CSI          | digit V               |
| O2                | L172 <sup>3,6</sup>    | no mutation          | no mutation          | male          | 40         | Ollier         | CSII         | scapula               |
| O3                | L271                   | R132C                |                      | female        | 26         | Ollier         | CSI          | distal femur          |
|                   | L286 T                 | R132C                |                      | female        | 23         | Ollier         | CSII         | femur                 |
| O4 <sup>1</sup>   | L149 T3                | R132C                |                      | male          | 34         | Ollier         | CSI          | unknown               |
|                   | L204 II <sup>2,3</sup> | R132C                |                      | male          | 26         | Ollier         | CSI          | femur                 |
|                   | L253 T3                | R132C                |                      | male          | 26         | Ollier         | CSI          | tibia                 |
| O5                | L206                   | R132C                |                      | female        | 25         | Ollier         | EC           | hand                  |
| O6                | L816-1                 | no mutation          | R172S                | male          | 68         | Ollier         | CSIII        | humerus               |
|                   | L813 T                 | no mutation          | R172S                | male          | 68         | Ollier         | CSII         | femur                 |
| O7 <sup>1</sup>   | L898 <sup>6</sup>      | no mutation          | no mutation          | male          | 18         | Ollier         | CSI          | femur                 |
| O8 <sup>1</sup>   | L1251                  | R132H                |                      | male          | 15         | Ollier         | EC           | hand                  |
|                   | L2220                  | R132H                |                      | male          | 14         | Ollier         | EC           | digit                 |
| O9                | L1974                  | R132C                |                      | male          | 48         | Ollier         | CSII         | scapula               |
| O10 <sup>1</sup>  | L1975                  | R132C                |                      | male          | 31         | Ollier         | CSII         | femur                 |
| O11               | L1976                  | R132C                |                      | male          | 41         | Ollier         | CSII         | tibia                 |
| O12 <sup>1</sup>  | L1977                  | R132C                |                      | male          | 41         | Ollier         | CSI          | tibia                 |
|                   | L1978                  | R132C                |                      | male          | 38         | Ollier         | EC           | foot                  |
|                   | L1979                  | R132C                |                      | male          | 41         | Ollier         | CSI          | tibia                 |
|                   | L3363                  | R132C                |                      | male          | 36         | Ollier         | EC           | toe                   |
| O13               | L1980 <sup>2</sup>     | R132C                |                      | female        | 63         | Ollier         | CSII         | knee                  |
| O14               | L1685                  | R132C                |                      | female        | 23         | Ollier         | CSI          | pubic bone            |
| O15               | L1686                  | R132C                |                      | male          | 18         | Ollier         | EC           | phalanx               |
|                   | L1687                  | R132C                |                      | male          | 18         | Ollier         | CSI          | phalanx               |
| O16               | L2386                  | R132H                |                      | female        | 13         | Ollier         | CSI          | digit III             |
| O17 <sup>1</sup>  | L2463                  | R132C                |                      | female        | 12         | Ollier         | EC           | tibia                 |
| O18               | L1629                  | R132C                |                      | male          | 36         | Ollier         | EC           | unknown               |
|                   | L1630                  | R132C                |                      | male          | 36         | Ollier         | CSI          | iliac bone            |
| O19               | L2095                  | R132C                |                      | female        | 23         | Ollier         | EC           | distal tibia          |

|                  |                          |             |             |         |       |          |       |                   |
|------------------|--------------------------|-------------|-------------|---------|-------|----------|-------|-------------------|
| O20 <sup>5</sup> | L2590 <sup>2</sup>       | R132H       |             | female  | 36    | Ollier   | CSI   | metatarsal I      |
|                  | L2761                    | no mutation | no mutation | female  | 37    | Ollier   | CSI   | tibia             |
| O21              | L2098 <sup>3</sup>       | no mutation | no mutation | female  | 15    | Ollier   | CSII  | humerus           |
| O22              | L2099                    | R132C       |             | female  | 49    | Ollier   | CSI   | prox humerus      |
| O23              | L2100                    | no mutation | no mutation | male    | 27    | Ollier   | EC    | femur             |
| O24              | L2103a                   | R132C       |             | male    | 39    | Ollier   | EC    | phalanx           |
|                  | L2103b                   | R132C       |             | male    | 39    | Ollier   | CSI   | distal phalanx    |
| O25              | L2104a                   | R132C       |             | male    | 36    | Ollier   | CSIII | prox tibia        |
| O26 <sup>1</sup> | L2221                    | R132C       |             | female  | 42    | Ollier   | CSI   | distal femur      |
| O27 <sup>1</sup> | L1513                    | R132C       |             | female  | 23    | Ollier   | CSI   | distal femur      |
| O28 <sup>1</sup> | L1490                    | R132H       |             | female  | 12    | Ollier   | EC    | phalanx           |
| O29              | L2640                    | R132C       |             | female  | 34    | Ollier   | EC    | phalanx           |
|                  | L2641                    | R132C       |             | female  | 34    | Ollier   | EC    | thumb             |
| O30              | L2205                    | R132C       |             | male    | 6     | Ollier   | EC    | illum             |
| O31              | L1683                    | R132C       |             | unknown | 29    | Ollier   | CSI   | metacarpal        |
| O32 <sup>1</sup> | L2280                    | R132C       |             | female  | 24    | Ollier   | CSI   | left acromion     |
| O33              | L2513 <sup>3</sup>       | no mutation | no mutation | male    | 33    | Ollier   | CSI   | pelvis            |
| O34              | L2746                    | R132C       |             | female  | 58    | Ollier   | CSI   | digit II          |
| O35 <sup>1</sup> | L3325A                   | R132H       |             | male    | 6     | Ollier   | EC    | hand              |
| O36 <sup>1</sup> | L3362A                   | R132C       |             | female  | 6     | Ollier   | EC    | proximal tibia    |
|                  | L3362C                   | R132C       |             | female  | 6     | Ollier   | EC    | left distal femur |
| O37              | OLR30 <sup>4</sup>       | R132C       |             | male    | 8     | Ollier   | EC    | right leg         |
| O38              | S-03-3802 <sup>2,4</sup> | R132H       |             | female  | 16    | Ollier   | EC    | hand              |
| O39              | S-05-4941 <sup>4</sup>   | R132H       |             | male    | 13    | Ollier   | EC    | hand              |
| O40              | S-05-6625 <sup>4</sup>   | R132C       |             | female  | 11    | Ollier   | EC    | hand              |
| O41              | S-08-3234 <sup>4</sup>   | R132H       |             | female  | 4     | Ollier   | EC    | hand              |
| O42              | S-08-7943 <sup>4</sup>   | no mutation | no mutation | male    | 12    | Ollier   | EC    | hand              |
| O43              | S-08-9181 <sup>4</sup>   | no mutation | no mutation | female  | 12    | Ollier   | EC    | hand              |
| M1               | L1684                    | R132C       |             | female  | 37    | Maffucci | EC    | phalanx           |
| M2               | L2097b                   | R132C       |             | female  | 19    | Maffucci | EC    | toe               |
|                  | L2097a                   | R132C       |             | female  | 19    | Maffucci | EC    | prox tibia        |
| M3               | L2102                    | R132C       |             | male    | 29    | Maffucci | CSII  | distal femur      |
| M4               | MAF100 <sup>2</sup>      | R132C       |             | male    | birth | Maffucci | CSI   | hand              |
| M5               | MAF200                   | R132C       |             | female  | 4     | Maffucci | SCH   | right hand        |

|     |                               |             |             |        |    |          |     |                 |
|-----|-------------------------------|-------------|-------------|--------|----|----------|-----|-----------------|
| M6  | MAF210 <sup>3</sup>           | no mutation | no mutation | female | -  | Maffucci | SCH | -               |
| M7  | MAF230                        | R132C       |             | female | 2  | Maffucci | SCH | right foot      |
| M8  | MAF250 <sup>3</sup>           | no mutation | no mutation | female | 3  | Maffucci | EC  | right hand      |
| M9  | S08-0010959 4A <sup>4</sup>   | no mutation | no mutation | male   | 15 | Maffucci | SCH | digit           |
|     | S08-0010959 5A <sup>4</sup>   | no mutation | no mutation | male   | 15 | Maffucci | SCH | forearm         |
| M10 | S08-0007382 <sup>2,4</sup>    | R132C       |             | male   | 9  | Maffucci | SCH | hand            |
| M11 | S05-0006227 <sup>2,4</sup>    | R132C       |             | male   | 10 | Maffucci | SCH | digit           |
| M12 | S97-0002538 1A <sup>4</sup>   | R132C       |             | female | 30 | Maffucci | SCH | foot            |
|     | S97-0002538 3A <sup>4</sup>   | R132C       |             | female | 30 | Maffucci | SCH | first web space |
| M13 | S03-0001121 <sup>4</sup>      | R132C       |             | female | 23 | Maffucci | EC  | digit           |
|     | S97-0004447 4B <sup>2,4</sup> | R132C       |             | female | 17 | Maffucci | SCH | lower back      |

All patients were diagnosed as having Ollier disease or Maffucci syndrome based on the radiographical features and/or presence of more than two cartilaginous tumors (Ollier disease) in combination with hemangioma (Maffucci syndrome). <sup>1</sup> indicates DNA from normal tissue was also tested, <sup>2</sup> indicates cases negative in Sanger sequencing but positive in hydrolysis probes assay, <sup>3</sup> indicates cases used for sequencing of all exons of *IDH1* and *IDH2*, <sup>4</sup> indicates DNA was isolated from paraffin embedded tissue, <sup>5</sup> indicates patient with multiple tumors in which one tumor showed clearly mutation in the sequencing and another tumor was negative for the mutation. DNA was unavailable to perform hydrolysis probe assay. <sup>6</sup>Two chondrosarcomas of patients with Ollier disease were negative at the mutation analysis, while other tumors of the same patients demonstrated positive cells at R132H *IDH1* immunohistochemistry, suggesting that the percentage of patients carrying mutations in *IDH1* or *IDH2* is even higher than we report in this study. EC: enchondroma, CS: chondrosarcoma, SCH: spindle cell hemangioma.

**Supplementary Table 2. Tiling Array design**

| <b>Gene</b>   | <b>Number of probes</b> |
|---------------|-------------------------|
| <i>IDH1</i>   | 312                     |
| <i>IDH2</i>   | 208                     |
| <i>PTHLH</i>  | 338                     |
| <i>PTPN11</i> | 413                     |
| <i>PTH1R</i>  | 104                     |
| <i>EXT1</i>   | 833                     |
| <i>EXT2</i>   | 334                     |
| <i>ACP5</i>   | 93                      |

**Supplementary Table 4. Differentially expressed genes between tumors with and without *IDH1* or *IDH2* mutations at Sanger sequencing**

| <b>Probe ID</b> | <b>Target ID</b> | <b>logFC</b> | <b>adj.P.Val</b> |
|-----------------|------------------|--------------|------------------|
| 6280168         | <i>SERPINA3</i>  | 3.24         | 0.04267          |
| 4220431         | <i>EXT1</i>      | -0.73        | 0.03714          |
| 4210750         | <i>STARD7</i>    | -0.73        | 0.04397          |
| 2690541         | <i>C18ORF10</i>  | -0.57        | 0.04310          |
| 5050608         | <i>TIMM23</i>    | -0.49        | 0.03737          |
| 7320386         | <i>TTL</i>       | -0.42        | 0.04267          |
| 780021          | <i>OPN3</i>      | -0.37        | 0.04293          |
| 7380709         | <i>YWHAB</i>     | -0.35        | 0.02844          |
| 7040600         | <i>ARSB</i>      | -0.35        | 0.04267          |
| 2060112         | <i>CCNYLI</i>    | -0.29        | 0.02035          |
| 4480341         | <i>DHCR24</i>    | -0.29        | 0.03737          |
| 6270148         | <i>AK5</i>       | -0.29        | 0.02711          |
| 1410398         | <i>CCNYLI</i>    | -0.29        | 0.04152          |
| 6380193         | <i>DLX3</i>      | -0.27        | 0.02844          |
| 70270           | <i>MGC39900</i>  | -0.27        | 0.03099          |
| 4200070         | <i>MGC39900</i>  | -0.27        | 0.03313          |
| 6100390         | <i>CD276</i>     | -0.24        | 0.04267          |
| 6480333         | <i>TCIRG1</i>    | -0.23        | 0.04901          |
| 2810022         | <i>C1ORF163</i>  | -0.21        | 0.03174          |
| 5290358         | <i>CPT1A</i>     | -0.21        | 0.04293          |
| 3840750         | <i>15E1.2</i>    | -0.20        | 0.04267          |
| 4570242         | <i>LARGE</i>     | -0.19        | 0.03455          |
| 1050278         | <i>SRD5A1</i>    | -0.19        | 0.04293          |
| 6840753         | <i>SPTLC2</i>    | -0.18        | 0.03737          |
| 1570064         | <i>KIAA1522</i>  | -0.18        | 0.03737          |
| 6900309         | <i>ARSB</i>      | -0.18        | 0.04901          |
| 3440451         | <i>ADAMTS7</i>   | -0.17        | 0.04293          |
| 2450202         | <i>KIF3C</i>     | -0.17        | 0.00149          |
| 4920382         | <i>VAC14</i>     | -0.16        | 0.03737          |
| 360463          | <i>SRR</i>       | -0.16        | 0.03737          |
| 4180376         | <i>PI4KII</i>    | -0.14        | 0.04267          |
| 1450451         | <i>DOPEY2</i>    | -0.11        | 0.04293          |
| 1580397         | <i>ISCA2</i>     | -0.11        | 0.02844          |
| 2000020         | <i>CAMKK2</i>    | -0.11        | 0.03737          |
| 3170102         | <i>C12ORF49</i>  | -0.11        | 0.02844          |
| 10440           | <i>MARS2</i>     | -0.10        | 0.03778          |



**Supplementary Table 5. Primers used for Sanger sequencing**

| <b>Gene</b> | <b>Direction</b> | <b>Exon</b> | <b>Tissue type</b> | <b>Primer sequence (5' to 3')</b>          |
|-------------|------------------|-------------|--------------------|--------------------------------------------|
| <i>IDH1</i> | Forward          | 4           | Frozen             | TGAAAACGACGGCCAGTCCATCACTGCAGTTGTAGGTT     |
| <i>IDH1</i> | Reverse          | 4           | Frozen             | CAGGAAACAGCTATGACCCACATACAAGTTGGAAATTTCTGG |
| <i>IDH1</i> | Forward          | 4           | Paraffin           | TGAAAACGACGGCCAGTCGGTCTTCAGAGAAGCCATT      |
| <i>IDH1</i> | Reverse          | 4           | Paraffin           | CAGGAAACAGCTATGACCGCCAACATGACTTACTTGATCC   |
| <i>IDH1</i> | Forward          | 2           | Frozen             | TGAAAACGACGGCCAGTGGGCTGTCTGGCAGGTACTA      |
| <i>IDH1</i> | Reverse          | 2           | Frozen             | CAGGAAACAGCTATGACCTGTTGGAATTCGTTGTTGGA     |
| <i>IDH1</i> | Forward          | 3           | Frozen             | TGAAAACGACGGCCAGTACCGCGTGTGAAACATAACA      |
| <i>IDH1</i> | Reverse          | 3           | Frozen             | CAGGAAACAGCTATGACCGTTTGTACACGGAGGGGTA      |
| <i>IDH1</i> | Forward          | 5           | Frozen             | TGAAAACGACGGCCAGTTCCTTACAATTCCTGCTAGGG     |
| <i>IDH1</i> | Reverse          | 5           | Frozen             | CAGGAAACAGCTATGACCTTGTGCCTTTATTTCATGCCA    |
| <i>IDH1</i> | Forward          | 6           | Frozen             | TGAAAACGACGGCCAGTTGGTGGGTGATTTTAGCCTT      |
| <i>IDH1</i> | Reverse          | 6           | Frozen             | CAGGAAACAGCTATGACCTGGTTTTGTTTCACTCCTGCT    |
| <i>IDH1</i> | Forward          | 7           | Frozen             | TGAAAACGACGGCCAGTTGTTTGGGACAAGCAGATGA      |
| <i>IDH1</i> | Reverse          | 7           | Frozen             | CAGGAAACAGCTATGACCCAAAACCTCCCCTCCCAAAT     |
| <i>IDH1</i> | Forward          | 8           | Frozen             | TGAAAACGACGGCCAGTTGCTCTTCATGCAGTTGGAC      |
| <i>IDH1</i> | Reverse          | 8           | Frozen             | CAGGAAACAGCTATGACCTGCACACAAAACACTGAGCA     |
| <i>IDH1</i> | Forward          | 9           | Frozen             | TGAAAACGACGGCCAGTCCATGCCATGAAAATGTGTT      |
| <i>IDH1</i> | Reverse          | 9           | Frozen             | CAGGAAACAGCTATGACCGATGCTCTGAGCCCAGTGAG     |
| <i>IDH1</i> | Forward          | 10          | Frozen             | TGAAAACGACGGCCAGTGGACTTTACCACTACCTGCTACC   |
| <i>IDH1</i> | Reverse          | 10          | Frozen             | CAGGAAACAGCTATGACCTGGCCTGAGCTAGTTTGATCT    |
| <i>IDH2</i> | Forward          | 4           | Frozen             | TGAAAACGACGGCCAGTTTGTGCTTGGGGTTCAAAT       |
| <i>IDH2</i> | Reverse          | 4           | Frozen             | CAGGAAACAGCTATGACCCTGCAGAGACAAGAGGATGG     |
| <i>IDH2</i> | Forward          | 4           | Paraffin           | TGAAAACGACGGCCAGTAACATCCACGCCTAGTCC        |
| <i>IDH2</i> | Reverse          | 4           | Paraffin           | CAGGAAACAGCTATGACCCAGTGGATCCCCTCTCCAC      |
| <i>IDH2</i> | Forward          | 1           | Frozen             | TGAAAACGACGGCCAGTCTCGTTCGCTCTCCAGCTT       |
| <i>IDH2</i> | Reverse          | 1           | Frozen             | CAGGAAACAGCTATGACCGCCACCGTCCCTCAAGTC       |
| <i>IDH2</i> | Forward          | 2           | Frozen             | TGAAAACGACGGCCAGTATGATGCGCTGTGTGTCC        |
| <i>IDH2</i> | Reverse          | 2           | Frozen             | CAGGAAACAGCTATGACCGGGACAGAACAATCCCTGG      |
| <i>IDH2</i> | Forward          | 3           | Frozen             | TGAAAACGACGGCCAGTGTCCCTGAGTCACTGGGGT       |
| <i>IDH2</i> | Reverse          | 3           | Frozen             | CAGGAAACAGCTATGACCCCTGTGACCCTCCCTGG        |
| <i>IDH2</i> | Forward          | 5           | Frozen             | TGAAAACGACGGCCAGTAGCTCCTCGCCTAGCCAT        |
| <i>IDH2</i> | Reverse          | 5           | Frozen             | CAGGAAACAGCTATGACCTGAAGAGACAAGCTGGGAGA     |
| <i>IDH2</i> | Forward          | 6           | Frozen             | TGAAAACGACGGCCAGTCCAGGCTAGGGCACCAC         |
| <i>IDH2</i> | Reverse          | 6           | Frozen             | CAGGAAACAGCTATGACCGGAAGAAAGGCCACAGAGT      |
| <i>IDH2</i> | Forward          | 7           | Frozen             | TGAAAACGACGGCCAGTCCCTCTCCCATAACAGACCTT     |
| <i>IDH2</i> | Reverse          | 7           | Frozen             | CAGGAAACAGCTATGACCAGAAGACCAACAGTCCACCC     |
| <i>IDH2</i> | Forward          | 8           | Frozen             | TGAAAACGACGGCCAGTAGGCCCTGAGAGAAAGGCT       |
| <i>IDH2</i> | Reverse          | 8           | Frozen             | CAGGAAACAGCTATGACCGGTAGAGGGGCATTGTGAGG     |

|              |         |    |        |                                             |
|--------------|---------|----|--------|---------------------------------------------|
| <i>IDH2</i>  | Forward | 9  | Frozen | TGTAAAACGACGGCCAGTGCTCTTGATCTCCCTGCAAC      |
| <i>IDH2</i>  | Reverse | 9  | Frozen | CAGGAAACAGCTATGACCGGACCCAGAGCCTGTCCT        |
| <i>IDH2</i>  | Forward | 10 | Frozen | TGTAAAACGACGGCCAGTGCACAGATGGGGTCTCATT       |
| <i>IDH2</i>  | Reverse | 10 | Frozen | CAGGAAACAGCTATGACCAGGGTCTGCCTACCACCC        |
| <i>PTH1R</i> | Forward | 4  | Frozen | CCTGTCTGCCGGAATGG                           |
| <i>PTH1R</i> | Reverse | 4  | Frozen | TGATTGAAGTCATAAATGTAGTCCG                   |
| <i>PTH1R</i> | Forward | 5  | Frozen | TTGGAGCTAGGGGTTTCAGTG                       |
| <i>PTH1R</i> | Reverse | 5  | Frozen | GTAGTTGGCCACGTCCTGT                         |
| <i>PTH1R</i> | Forward | 9  | Frozen | ATCCACATGCACCTGTTCT                         |
| <i>PTH1R</i> | Reverse | 9  | Frozen | GGCAGAGGGTACTCACGTA                         |
| <i>GNAS</i>  | Forward | 8  | Frozen | TGTAAAACGACGGCCAGTTCGGTTGGCTTTGGTGAGATCCAT  |
| <i>GNAS</i>  | Reverse | 8  | Frozen | CAGGAAACAGCTATGACCTGACTTTGTCCACCTGGAAGTTGGT |

---

**Supplementary Table 6. Probes used in hydrolysis probe assays for *IDH1***

| <b>Name</b>         | <b>Direction</b> | <b>Sequence</b>               | <b>Dye</b> | <b>Remark</b> |
|---------------------|------------------|-------------------------------|------------|---------------|
| R132C <i>IDH1</i>   | Forward          | CTTGTGAGTGGATGGGTAAAACCTA     | -          | -             |
| R132H <i>IDH1</i>   | Forward          | CTTGTGAGTGGATGGGTAAAACCTA     | -          | -             |
| R132C <i>IDH1</i>   | Reverse          | CACATTATTGCCAACATGACTTACTTGAT | -          | -             |
| R132H <i>IDH1</i>   | Reverse          | CCAACATGACTTACTTGATCCCCATA    | -          | -             |
| R132C <i>IDH1_V</i> | -                | AAGCATGACGACCTATG             | VIC        | Reporter 1    |
| R132H <i>IDH1_V</i> | -                | CATCATAGGTCGTCATGC            | VIC        | Reporter 1    |
| R132C <i>IDH1_M</i> | -                | AAGCATGACAACCTATG             | FAM        | Reporter 2    |
| R132H <i>IDH1_M</i> | -                | ATCATAGGTCATCATGC             | FAM        | Reporter 2    |
